# Supplementary figures and images for: The Interplay of Microtubules with Mitochondria–ER Contact Sites (MERCs) in Glioblastoma
Source: MDPI journal article supplement (doi:10.3390/biom12040567), 2022-04-12

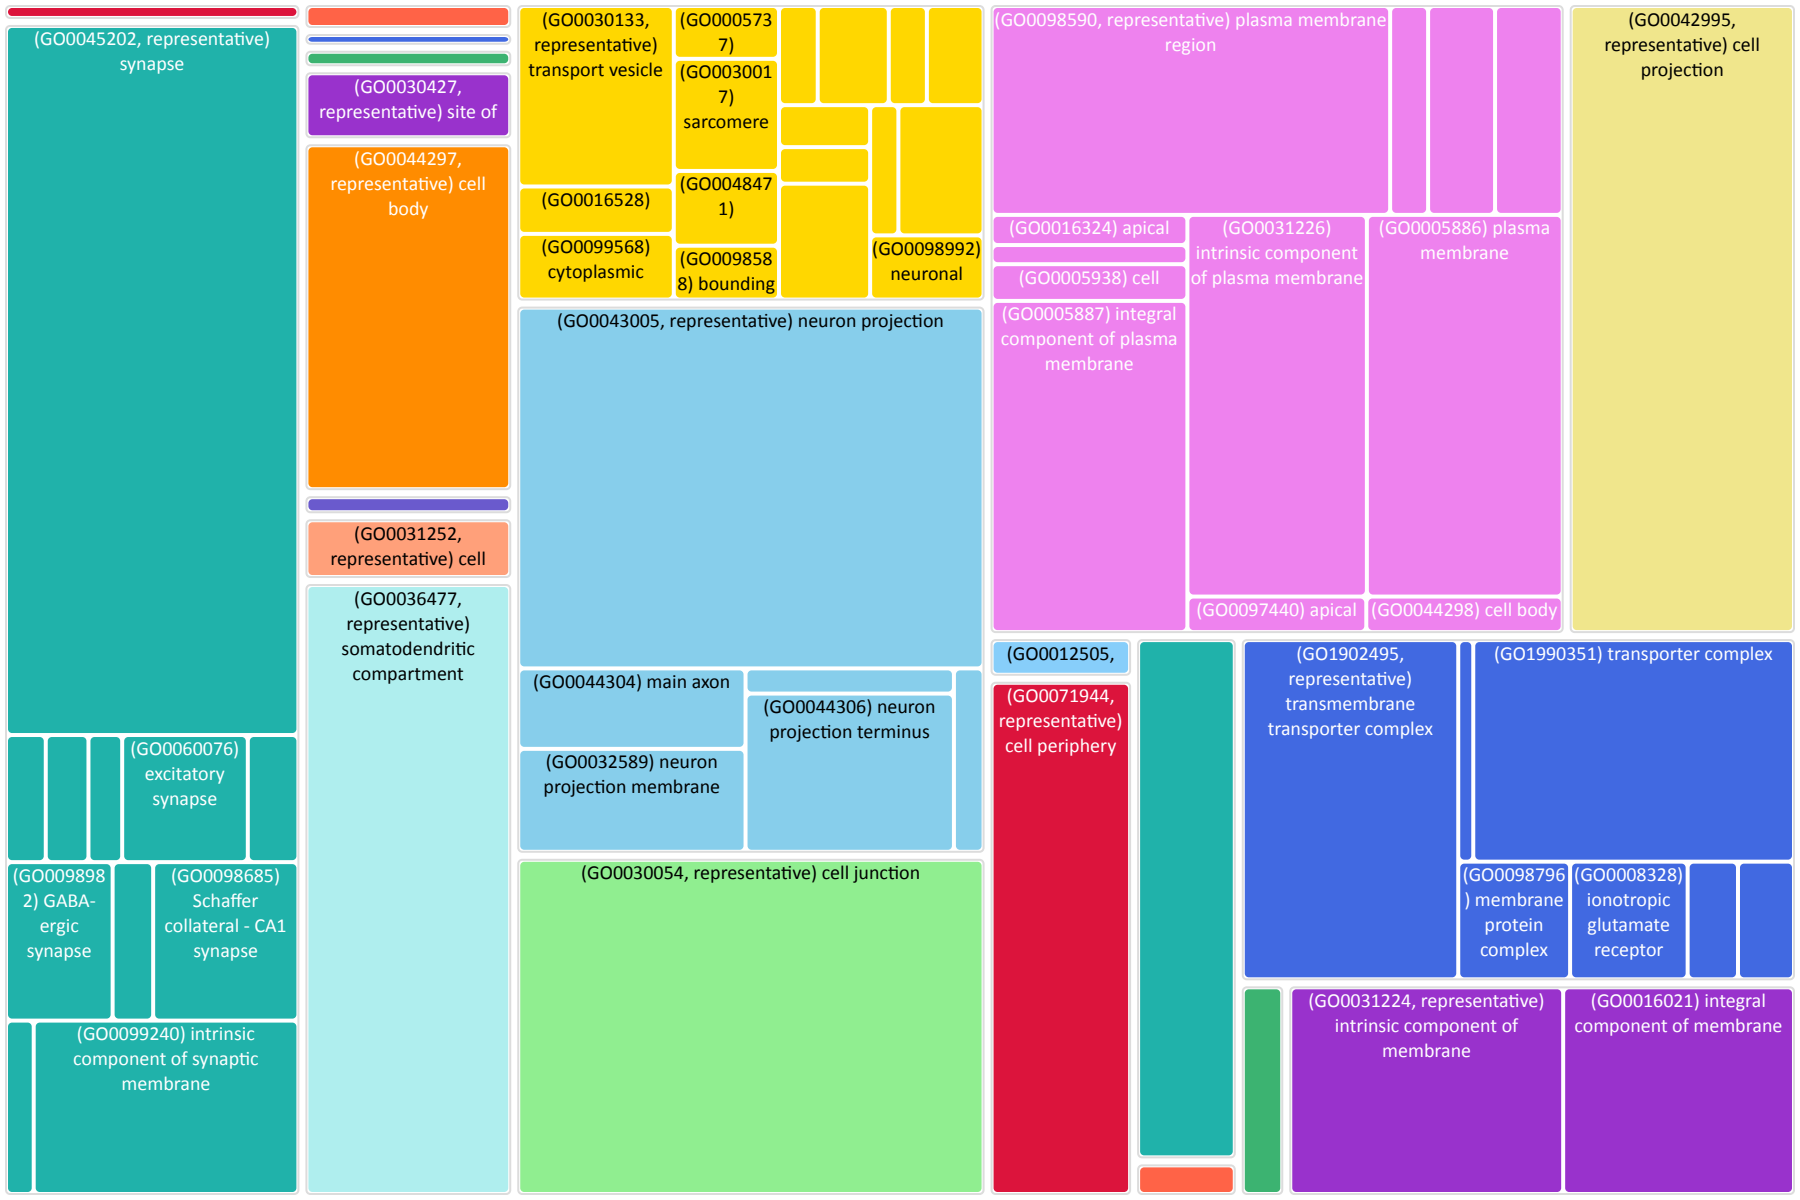

Supplement: s1 [file s1]
